# Supplementary material for: Comparative Analysis of SLA-1, SLA-2, and DQB1 Genetic Diversity in Locally-Adapted Kenyan Pigs and Their Wild Relatives, Warthogs
Source: MDPI journal article supplement (doi:10.3390/vetsci8090180), 2021-09-02
Supplement: s1 [file s1]

**Supplementary Table S3A:** The polypeptide predictions for the *SLA-2* sequences.

| region of interest | Domain name          | refseq accession | original feature annotation in the refseq (nucl) |        | columns in largest_compact_alignment |      | num. codons |
|--------------------|----------------------|------------------|--------------------------------------------------|--------|--------------------------------------|------|-------------|
|                    |                      |                  | begin                                            | end    | begin                                | end  |             |
| largest alignment  |                      | AJ251829.1       |                                                  |        | 1                                    | 1056 | 352         |
| exon 1             | Peptide leader       | AJ251829.1       | 144585                                           | 144648 | 1                                    | 31   | 10          |
| exon 2 (PBR)       | α1                   | AJ251829.1       | 144963                                           | 145232 | 32                                   | 304  | 91          |
| exon 3 (PBR)       | α2                   | AJ251829.1       | 145460                                           | 145735 | 305                                  | 580  | 92          |
| exon 4             | α3                   | AJ251829.1       | 146344                                           | 146619 | 581                                  | 856  | 92          |
| exon 5             | Transmembrane domain | AJ251829.1       | 146739                                           | 146849 | 857                                  | 967  | 37          |
| exon 6             | Cytoplasmic tail     | AJ251829.1       | 147294                                           | 147326 | 968                                  | 1000 | 11          |
| exon 7             | Cytoplasmic tail     | AJ251829.1       | 147454                                           | 147504 | 1001                                 | 1051 | 17          |
| exon 8             | 3' UTR               | AJ251829.1       | 147665                                           | 147669 | 1052                                 | 1056 | 2           |

**Supplementary Table S3B:** The SLA polypeptide predictions for the *DQB1* sequences.

| Region of interest | Domain name          | Refseq accession | Original feature annotation in the RefSeq (Nucl) |      | Region spanned by our data with reference to the RefSeq (Nucl) |     | columns in largest_compact_alignment |     | No of codons |
|--------------------|----------------------|------------------|--------------------------------------------------|------|----------------------------------------------------------------|-----|--------------------------------------|-----|--------------|
|                    |                      |                  | begin                                            | end  | begin                                                          | end | begin                                | end |              |
| Largest alignment  |                      | NM_001113694.1   |                                                  |      | 82                                                             | 840 | 1                                    | 759 | 253          |
| Exon 1             | Peptide leader       | NM_001113694.1   | 1                                                | 160  | 82                                                             | 160 | 1                                    | 79  | 26           |
| Exon 2 (PBR)       | β1                   | NM_001113694.1   | 161                                              | 430  | 161                                                            | 430 | 80                                   | 349 | 90           |
| Exon 3             | β2                   | NM_001113694.1   | 431                                              | 712  | 431                                                            | 712 | 350                                  | 631 | 94           |
| Exon 4             | Transmembrane domain | NM_001113694.1   | 713                                              | 823  | 713                                                            | 823 | 632                                  | 742 | 37           |
| Exon 5             | Cytoplasmic tail     | NM_001113694.1   | 824                                              | 1194 | 824                                                            | 840 | 743                                  | 759 | 5.67         |
