# Supplementary material for: Comparative Analysis of SLA-1, SLA-2, and DQB1 Genetic Diversity in Locally-Adapted Kenyan Pigs and Their Wild Relatives, Warthogs
Source: MDPI journal article supplement (doi:10.3390/vetsci8090180), 2021-09-02
Supplement: s1 [file s1]

**Table S1:** The locus-specific primers for reverse transcription-polymerase chain reaction (RT-PCR) based method for DNA sequence-based typing (SBT) of the three SLA genes.

| Locus        | Primer name     | Primer sequence (5'-3')                       | Annealing Temperature (T <sub>a</sub> ) °C | Amplicon size (bp) | Target Domain (s)             | Reference          |
|--------------|-----------------|-----------------------------------------------|--------------------------------------------|--------------------|-------------------------------|--------------------|
| <b>SLA-1</b> | T7-SLA-alpha-F  | TAATACGACTCACTATAGGGACCGCCGTGTCCCGGC(C/T)CGAC | 60                                         | 280                | Exon 2 (alpha 1)              | This study.        |
|              | SP6-SLA-Alpha-R | ATTTAGGTGACACTATAGCCTCGCTCTGGTTGTAGTAGC       |                                            |                    |                               |                    |
| <b>SLA-2</b> | SLA-2_F         | CCACAGAATCTCCGCAGATTCC                        | 65                                         | 1232               | Exons 1-8 (all SLA-2 domains) | (Gao et al., 2014) |
|              | SLA-2_R         | CCGACACAGACACATTCAAATGCT                      |                                            |                    |                               |                    |
| <b>DQB1</b>  | DQB1 -F         | GGGATAGGAGAACCACTGAG                          | 66                                         | 917                | Exons 1-5 (all DQB1 domains)  | (Gao et al., 2014) |
|              | DQB1 -R         | AATTCAGGCAAGAACAGAC                           |                                            |                    |                               |                    |
